# Supplementary material for: Prognostic models for stable coronary artery disease based on electronic health record cohort of 102 023 patients
Source: PubMed Central journal article supplement — Eur Heart J. 2013 Dec 17;35(13):844–52. doi: 10.1093/eurheartj/eht533 (PMC3971383; doi:10.1093/eurheartj/eht533), 2013-12-17
Supplement: supp_eht533_eht533supp_figs.pdf [file supp_eht533_eht533supp_figs.pdf]

**eFigure1 Calibration of 5-year risk predictions for all-cause mortality and non-fatal MI or coronary death based on internal cross-validation (within CALIBER).**

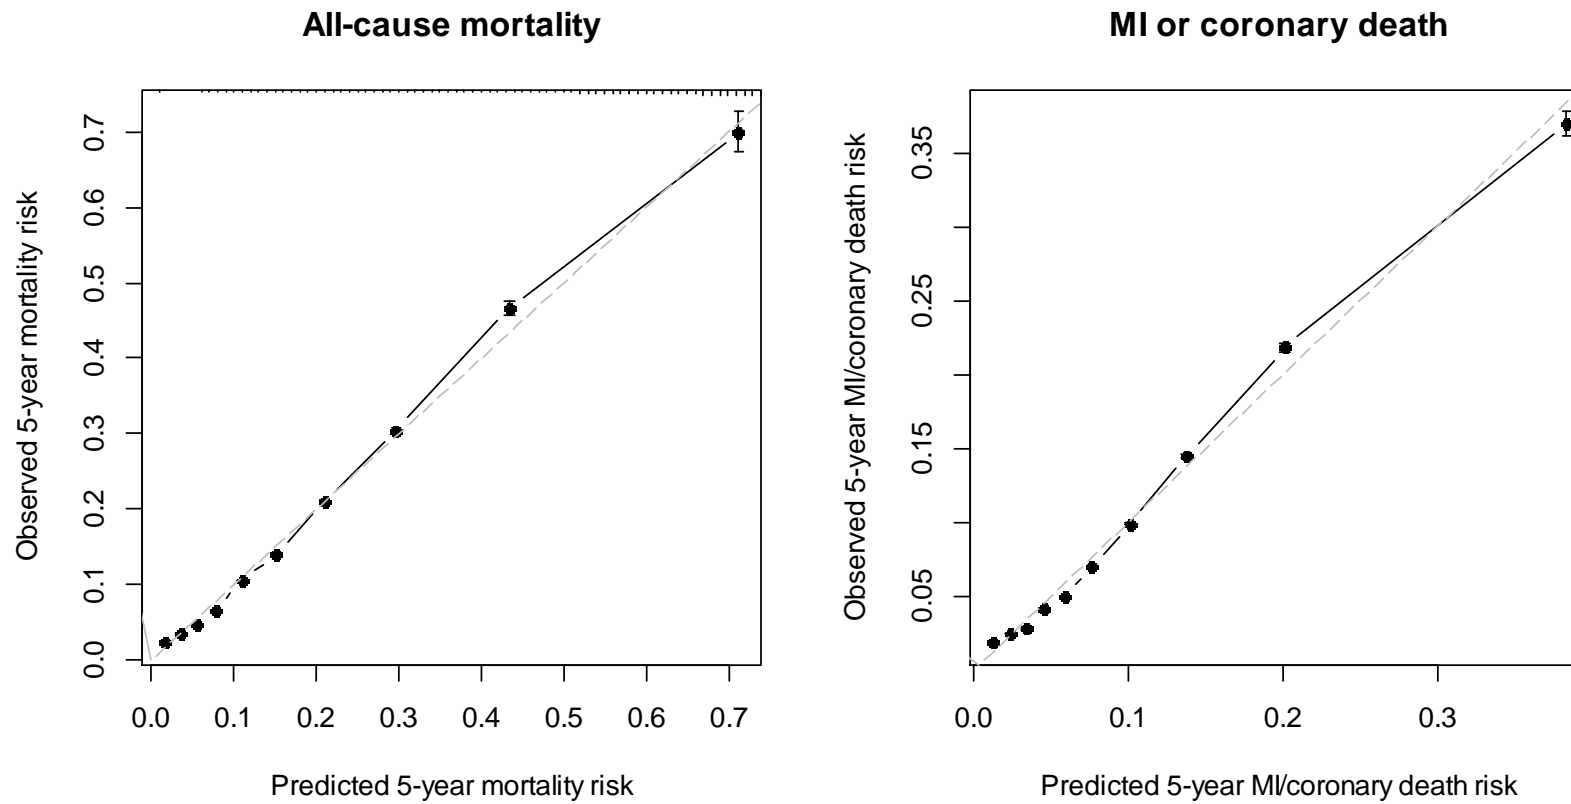

Observed risks are based on Kaplan-Meier. Individuals are split into 10 equally sized subgroups and the mean 5-year predicted risk is computed.

eFigure2 Calibration of 5-year risk predictions for all-cause mortality and non-fatal MI or coronary death based on external validation in patients from the ACRE study.

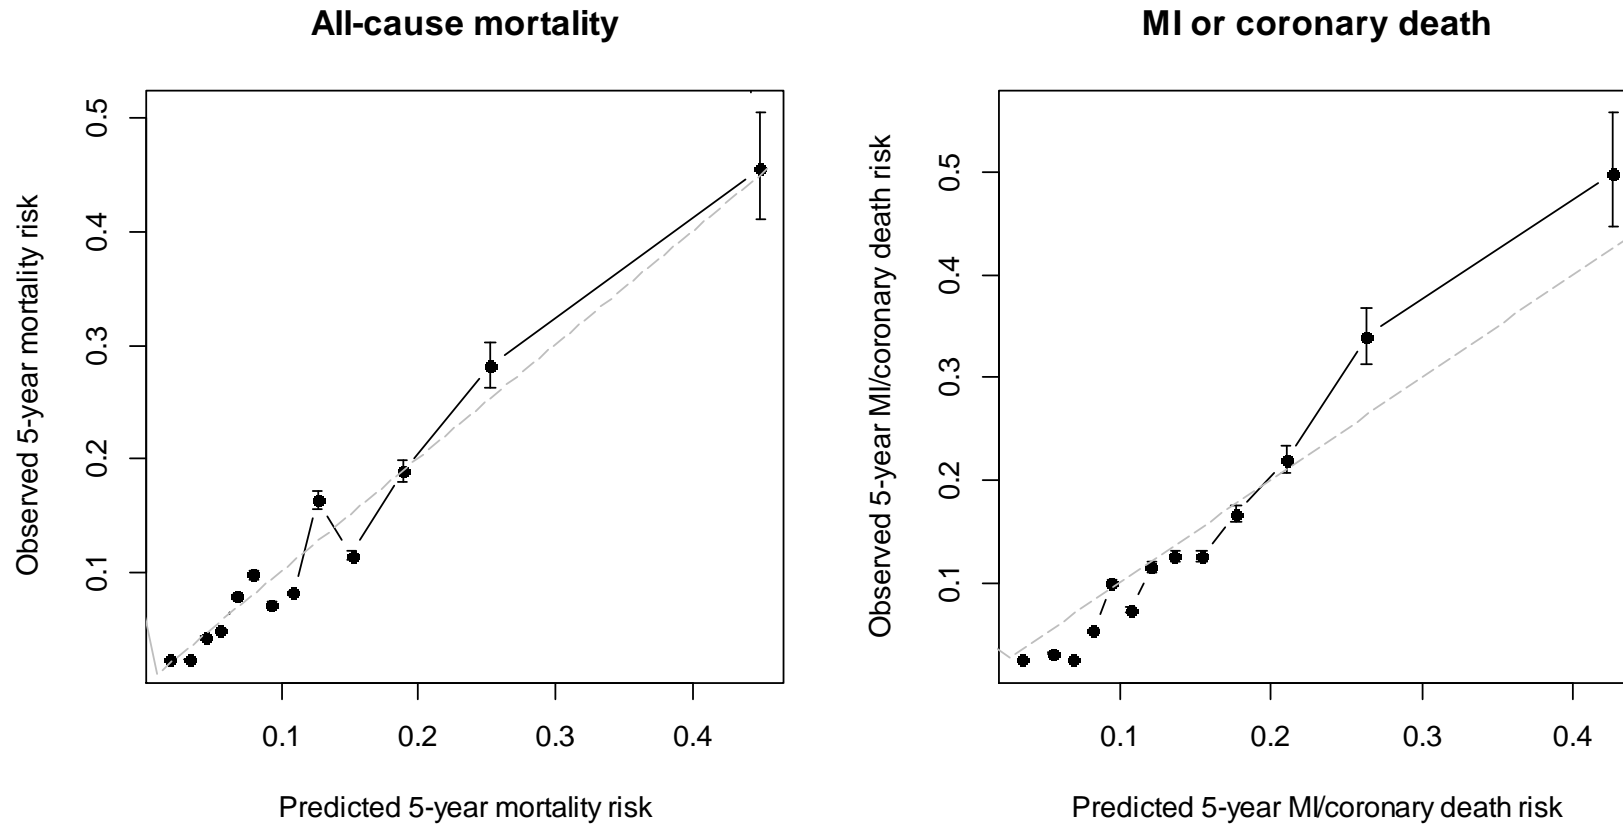

Observed risks are based on Kaplan-Meier. Individuals are split into 10 equally sized subgroups and the mean 5-year predicted risk is computed.

eFigure3 Number of life years gained (event-free life years for the non-fatal MI or coronary death endpoint) when the models are used to support management decisions for very high risk patients\*.

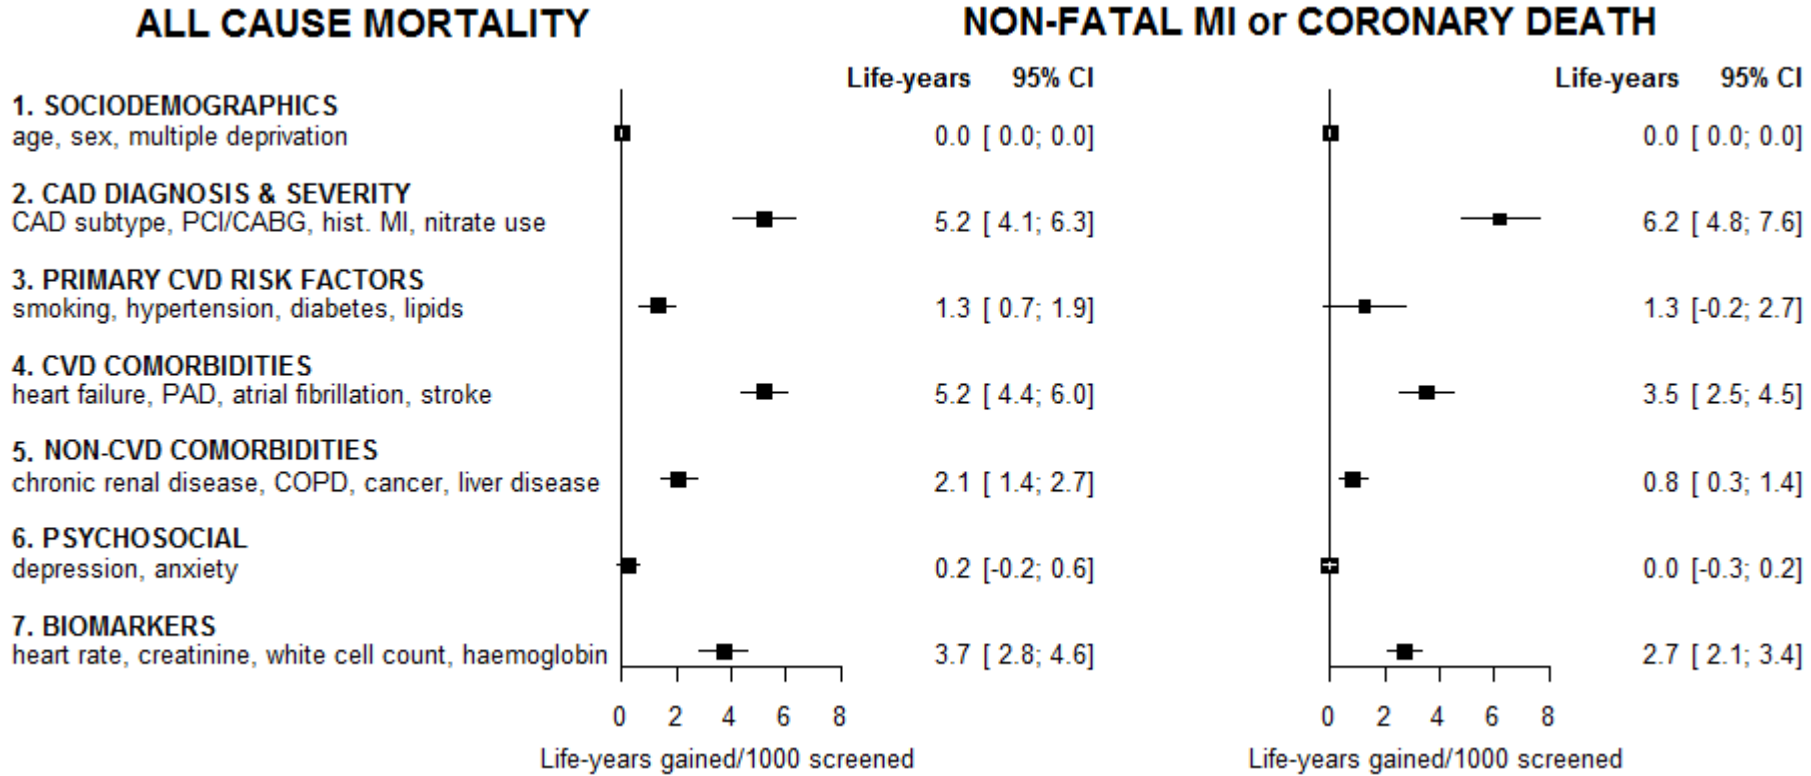

\* assuming that management is associated with hazard ratio 0.8 (20% risk reduction) and is cost-effective at very high risk (>20% over 5-years)

eFigure 4 Scoring tables to assess 5-year risk of death or MI/CHD death in stable CAD patients.

| Age       | Death |     | MI/CHD death |     | CAD DIAGNOSIS           | Death        | MI/CHD death        | MEDICAL HISTORY     | Death | MI/CHD death | LOOKUP TABLE** |             |                    |
|-----------|-------|-----|--------------|-----|-------------------------|--------------|---------------------|---------------------|-------|--------------|----------------|-------------|--------------------|
|           | MEN   | WOM | MEN          | WOM |                         |              |                     |                     |       |              | 5-year risk    | Death score | MI/CHD death score |
| <b>30</b> | 23    | 0   | 33           | 0   | Stable angina           | 0            | 0                   | Recurrent MI        | 2     | 8            | 1%             | 96          | 152                |
| <b>35</b> | 30    | 8   | 39           | 8   | Angina symptoms*        | 3            | 9                   | Heart failure       | 9     | 11           | 2%             | 110         | 170                |
| <b>40</b> | 36    | 16  | 44           | 16  | Asymptomatic CHD        | 0            | 5                   | PAD                 | 5     | 9            | 3%             | 118         | 181                |
| <b>45</b> | 42    | 24  | 50           | 24  | Unstable angina         | 0            | 5                   | Atrial fibrillation | 5     | 5            | 4%             | 123         | 188                |
| <b>50</b> | 49    | 32  | 55           | 32  | STEMI                   | 2            | 17                  | Stroke              | 6     | 4            | 5%             | 128         | 194                |
| <b>55</b> | 55    | 40  | 61           | 40  | NSTEMI                  | 5            | 22                  | Renal disease       | 3     | 3            | 10%            | 142         | 212                |
| <b>60</b> | 62    | 48  | 66           | 47  | No PCI/CABG             | 11           | 16                  | COPD                | 3     | 2            | 15%            | 150         | 223                |
| <b>65</b> | 68    | 56  | 72           | 55  | <b>CVD risk factors</b> | <b>Death</b> | <b>MI/CHD death</b> | Cancer              | 6     | 0            | 20%            | 157         | 231                |
| <b>70</b> | 74    | 64  | 78           | 63  | Non smoker              | 0            | 0                   | Liver disease       | 10    | 3            | 25%            | 161         | 238                |
| <b>75</b> | 81    | 71  | 83           | 71  | Current smoker          | 5            | 5                   | Depression          | 4     | 1            | 30%            | 166         | 243                |
| <b>90</b> | 100   | 95  | 100          | 95  | Diabetic                | 4            | 8                   | Anxiety             | 3     | 0            | 40%            | 173         | 253                |
|           |       |     |              |     |                         |              |                     |                     |       |              | 50%            | 179         | 260                |

| Total cholesterol mmol/L | Death | MI/CHD death | HDL mmol/L | Death | MI/CHD death | Heart rate, beats/min | Death | MI/CHD death | Creatinine μmol/L | Death | MI/CHD death | White cell count, 10 <sup>9</sup> /L | Death | MI/CHD death | Haemo globin, g/dL | Death | MI/CHD death |
|--------------------------|-------|--------------|------------|-------|--------------|-----------------------|-------|--------------|-------------------|-------|--------------|--------------------------------------|-------|--------------|--------------------|-------|--------------|
| <b>2</b>                 | 1     | 1            | <b>1.0</b> | 0     | 24           | <b>40</b>             | 4     | 4            | <b>&lt;15</b>     | 0     | 0            | <b>5</b>                             | 6     | 7            | <b>2</b>           | 64    | 63           |
| <b>3</b>                 | 1     | 3            | <b>1.5</b> | 0     | 22           | <b>60</b>             | 8     | 9            | <b>15-39</b>      | 1     | 2            | <b>10</b>                            | 12    | 13           | <b>4</b>           | 57    | 56           |
| <b>4</b>                 | 1     | 4            | <b>2.0</b> | 0     | 19           | <b>80</b>             | 11    | 13           | <b>40-69</b>      | 2     | 4            | <b>15</b>                            | 18    | 20           | <b>6</b>           | 50    | 49           |
| <b>5</b>                 | 1     | 6            | <b>2.5</b> | 0     | 17           | <b>100</b>            | 15    | 18           | <b>70-99</b>      | 3     | 6            | <b>20</b>                            | 23    | 26           | <b>8</b>           | 43    | 42           |
| <b>6</b>                 | 1     | 7            | <b>3.0</b> | 0     | 15           | <b>120</b>            | 19    | 22           | <b>100-149</b>    | 4     | 8            | <b>25</b>                            | 29    | 33           | <b>10</b>          | 36    | 35           |
| <b>7</b>                 | 0     | 9            | <b>3.5</b> | 0     | 13           | <b>140</b>            | 23    | 27           | <b>150-199</b>    | 6     | 10           | <b>30</b>                            | 35    | 40           | <b>12</b>          | 29    | 28           |
| <b>8</b>                 | 0     | 10           | <b>4.0</b> | 0     | 11           |                       |       |              | <b>200-299</b>    | 7     | 20           | <b>35</b>                            | 41    | 46           | <b>14</b>          | 21    | 21           |
| <b>9</b>                 | 0     | 11           | <b>4.5</b> | 1     | 9            |                       |       |              | <b>300-399</b>    | 11    | 20           | <b>40</b>                            | 46    | 53           | <b>16</b>          | 14    | 14           |
| <b>10</b>                | 0     | 13           | <b>5.0</b> | 1     | 6            |                       |       |              | <b>&gt;400</b>    | 14    | 28           | <b>45</b>                            | 52    | 59           | <b>18</b>          | 7     | 7            |

\* Use of nitrates used as a proxy for angina symptoms

\*\* If patient belongs to the 5<sup>th</sup> most deprived quintile of the population add 3 to the total score for either outcome (death or MI/CHD death).
