# Supplementary material for: Prognostic models for stable coronary artery disease based on electronic health record cohort of 102 023 patients
Source: PubMed Central journal article supplement — Eur Heart J. 2013 Dec 17;35(13):844–52. doi: 10.1093/eurheartj/eht533 (PMC3971383; doi:10.1093/eurheartj/eht533), 2013-12-17
Supplement: supp_eht533_eht533supp_table1.pdf [file supp_eht533_eht533supp_table1.pdf]

## Rapsomaniki

Prognostic models for stable coronary artery disease based on electronic health record cohort of 102,023 patients

**eTable1 A comparison of the CALIBER prognostic model with previous prognostic models developed for stable coronary disease.**

|                                                    | LIPID Trial <sup>5</sup>                 | EuroScore <sup>6</sup>                | ACTION Trial <sup>7</sup>                      | CALIBER                                                                                                                                    |
|----------------------------------------------------|------------------------------------------|---------------------------------------|------------------------------------------------|--------------------------------------------------------------------------------------------------------------------------------------------|
| Population size, N                                 | 8,557                                    | 3,031                                 | 7,311                                          | <b>102,023</b>                                                                                                                             |
| STUDY POPULATION                                   |                                          |                                       |                                                |                                                                                                                                            |
| % stable angina / other CHD                        | 0%                                       | 95%                                   | 50%                                            | <b>66%</b>                                                                                                                                 |
| % stable after ACS                                 | 100%                                     | 5%                                    | 50%                                            | <b>34%</b>                                                                                                                                 |
| All-cause mortality endpoint                       | No                                       | No                                    | Yes                                            | <b>Yes</b>                                                                                                                                 |
| Coronary endpoint (non-fatal MI or coronary death) | Yes                                      | No                                    | No                                             | <b>Yes</b>                                                                                                                                 |
| Events, N                                          | 1,190                                    | 328                                   | 1,063                                          | <b>20,817 deaths</b><br><b>8,856 non-fatal MI or coronary death</b>                                                                        |
| Differentiates MI into STEMI/NSTEMI                | No                                       | No                                    | No                                             | <b>Yes</b>                                                                                                                                 |
| Prognostic factors <sup>1</sup>                    |                                          |                                       |                                                |                                                                                                                                            |
| - <i>Clinical diagnoses</i>                        | 3 (prior CABG/PCI, stroke, hypertension) | any comorbidity (yes/no) <sup>2</sup> | 2 (MI, stroke)                                 | <b>10 (MI, hypertension, heart failure, PAD, atrial fibrillation, stroke, chronic kidney disease, COPD, cancer, chronic liver disease)</b> |
| - <i>Psychosocial</i>                              | 0                                        | 0                                     | 0                                              | <b>2 (depression, anxiety)</b>                                                                                                             |
| - <i>Biomarkers</i>                                | 2 (total & HDL cholesterol)              | 0                                     | 4 (SBP, creatinine, glucose, white cell count) | <b>6 (total &amp; HDL cholesterol, creatinine, white cell count, hemoglobin, heart rate)</b>                                               |
| Included patients with missing data                | No                                       | No                                    | No                                             | <b>Yes</b>                                                                                                                                 |
| Externally validated                               | No                                       | No                                    | No                                             | <b>Yes</b>                                                                                                                                 |
| Used electronic health records                     | No                                       | No                                    | No                                             | <b>Yes</b>                                                                                                                                 |

Abbreviations: SCAD, stable coronary artery disease; HDL, high-density lipoprotein cholesterol; MI, myocardial infarction; NSTEMI, non-ST-segment elevation myocardial infarction; PAD, peripheral arterial disease; SBP, systolic blood pressure; STEMI, ST-segment elevation myocardial infarction.

<sup>1</sup> all scores shown adjust for age, sex, smoking status, diabetes

<sup>2</sup> includes previous CVD event, PAD, heart failure and other major conditions not related to CVD
