# Supplementary material for: Prognostic models for stable coronary artery disease based on electronic health record cohort of 102 023 patients
Source: PubMed Central journal article supplement — Eur Heart J. 2013 Dec 17;35(13):844–52. doi: 10.1093/eurheartj/eht533 (PMC3971383; doi:10.1093/eurheartj/eht533), 2013-12-17
Supplement: supp_eht533_eht533supp_table2.pdf [file supp_eht533_eht533supp_table2.pdf]

Suppl\_eTable2.pdf

Rapsomaniki

Prognostic models for stable coronary artery disease based on electronic health

record cohort of 102,023 patients

**eTable2 Baseline characteristics of stable coronary artery disease patients included in the study.**

| Baseline characteristics                        | ALL            | Stable angina    | Other CHD        | Stable after     | Stable after     | Stable after   | Stable after MI  |
|-------------------------------------------------|----------------|------------------|------------------|------------------|------------------|----------------|------------------|
| N                                               | 102,023        | 45,645           | 21,915           | 13,325           | 4,700            | 6,818          | 9,620            |
| Age, mean (SD), y                               | 68.9 (12.8)    | 68.2 (13.0)      | 70.2 (11.2)      | 68.5 (13.7)      | 66.0 (13.2)      | 71.8 (13.1)    | 68.9 (13.5)      |
| Females, %                                      | 44,523 (43.6%) | 23,281 (51.0%)   | 7,977 (36.4%)    | 6,058 (45.5%)    | 1,303 (27.7%)    | 2,560 (37.5%)  | 3,344 (34.8%)    |
| White ethnicity, %                              | 77,802 (94.2%) | 33,344 (93.4%)   | 16,371 (94.7%)   | 10,691 (94.0%)   | 3,968 (95.7%)    | 5,746 (95.7%)  | 7,682 (95.4%)    |
| In most deprived quintile, %                    | 20,361 (20.0%) | 9,139 (20.0%)    | 4,200 (19.2%)    | 2,902 (21.8%)    | 941 (20.0%)      | 1,250 (18.3%)  | 1,929 (20.1%)    |
| <b>CVD RISK FACTORS</b>                         |                |                  |                  |                  |                  |                |                  |
| Non-smoker                                      | 23,134 (33.4%) | 10,831 (36.5%)   | 4,212 (27.9%)    | 2,717 (33.1%)    | 1,367 (32.6%)    | 2,451 (40.1%)  | 1,556 (26.2%)    |
| Ex-smoker                                       | 23,872 (34.5%) | 9,825 (33.1%)    | 5,365 (35.6%)    | 2,995 (36.5%)    | 1,182 (28.2%)    | 2,265 (37.1%)  | 2,240 (37.7%)    |
| Current smoker                                  | 22,203 (32.1%) | 9,024 (30.4%)    | 5,500 (36.5%)    | 2,486 (30.3%)    | 1,649 (39.3%)    | 1,394 (22.8%)  | 2,150 (36.2%)    |
| SBP, mean (SD), mmHg                            | 139.8 (22.3)   | 144.1 (21.8)     | 140.4 (21.3)     | 138.5 (22.1)     | 127.4 (20.5)     | 132.5 (21.5)   | 132.9 (22.8)     |
| DBP, mean (SD), mmHg                            | 78.9 (12.0)    | 81.3 (11.9)      | 78.6 (11.3)      | 78.1 (11.9)      | 74.1 (11.5)      | 74.5 (12.0)    | 76.2 (12.1)      |
| Hypertension                                    | 75,159 (73.7%) | 34,041 (74.6%)   | 18,316 (83.6%)   | 9,580 (71.9%)    | 2,565 (54.6%)    | 4,921 (72.2%)  | 5,736 (59.6%)    |
| Diabetes                                        | 14,421 (14.1%) | 5,926 (13.0%)    | 3,361 (15.3%)    | 1,995 (15.0%)    | 523 (11.1%)      | 1,273 (18.7%)  | 1,343 (14.0%)    |
| Total chol, mean (SD), mmol/L                   | 4.7 (1.2)      | 5.0 (1.2)        | 4.7 (1.1)        | 4.5 (1.1)        | 4.0 (1.0)        | 4.1 (1.0)      | 4.3 (1.0)        |
| HDL mean (SD), mmol/L                           | 1.3 (0.4)      | 1.4 (0.4)        | 1.3 (0.4)        | 1.3 (0.4)        | 1.2 (0.3)        | 1.3 (0.4)      | 1.3 (0.4)        |
| BMI, median (IQR), kg/m <sup>2</sup>            | 27.9 (5.4)     | 27.6 (24.4-31.3) | 27.0 (24.2-30.3) | 27.5 (24.5-31.2) | 26.7 (24.1-29.9) | 26.9 (23.9-    | 26.9 (24.0-30.0) |
| <b>CVD CO-MORBIDITIES</b>                       |                |                  |                  |                  |                  |                |                  |
| Prior MI                                        | 20,694 (20.3%) | 338 (0.7%)       | 10,636 (48.5%)   | 3,008 (22.6%)    | 1,188 (25.3%)    | 2,387 (35.0%)  | 3,137 (32.6%)    |
| Peripheral arterial disease                     | 8,923 (8.7%)   | 3,008 (6.6%)     | 2,288 (10.4%)    | 1,356 (10.2%)    | 395 (8.4%)       | 973 (14.3%)    | 903 (9.4%)       |
| Heart failure                                   | 26,194 (25.7%) | 10,639 (23.3%)   | 6,326 (28.9%)    | 4,012 (30.1%)    | 756 (16.1%)      | 2,196 (32.2%)  | 2,265 (23.5%)    |
| Atrial fibrillation                             | 15,887 (15.6%) | 6,602 (14.5%)    | 3,099 (14.1%)    | 2,348 (17.6%)    | 587 (12.5%)      | 1,649 (24.2%)  | 1,602 (16.7%)    |
| Stroke                                          | 9,799 (9.6%)   | 3,796 (8.3%)     | 2,216 (10.1%)    | 1,535 (11.5%)    | 298 (6.3%)       | 885 (13.0%)    | 1,069 (11.1%)    |
| <b>NON-CVD COMORBIDITIES</b>                    |                |                  |                  |                  |                  |                |                  |
| Chronic kidney disease                          | 7,006 (6.9%)   | 2,763 (6.1%)     | 1,212 (5.5%)     | 930 (7.0%)       | 415 (8.8%)       | 1,135 (16.6%)  | 551 (5.7%)       |
| COPD                                            | 23,956 (23.5%) | 10,903 (23.9%)   | 4,632 (21.1%)    | 3,599 (27.0%)    | 971 (20.7%)      | 1,735 (25.4%)  | 2,116 (22.0%)    |
| Cancer                                          | 9,236 (9.1%)   | 3,971 (8.7%)     | 2,000 (9.1%)     | 1,242 (9.3%)     | 426 (9.1%)       | 810 (11.9%)    | 787 (8.2%)       |
| Chronic liver disease                           | 1,002 (1.0%)   | 430 (0.9%)       | 149 (0.7%)       | 175 (1.3%)       | 57 (1.2%)        | 98 (1.4%)      | 93 (1.0%)        |
| Rheumatoid arthritis                            | 5,028 (4.9%)   | 2,210 (4.8%)     | 1,023 (4.7%)     | 694 (5.2%)       | 227 (4.8%)       | 442 (6.5%)     | 432 (4.5%)       |
| Hypothyroidism                                  | 7,298 (7.2%)   | 3,384 (7.4%)     | 1,461 (6.7%)     | 1,030 (7.7%)     | 265 (5.6%)       | 577 (8.5%)     | 581 (6.0%)       |
| Hyperthyroidism                                 | 2,030 (2.0%)   | 921 (2.0%)       | 426 (1.9%)       | 302 (2.3%)       | 66 (1.4%)        | 151 (2.2%)     | 164 (1.7%)       |
| <b>PSYCHOSOCIAL</b>                             |                |                  |                  |                  |                  |                |                  |
| Depression                                      | 17,040 (16.7%) | 8,045 (17.6%)    | 3,151 (14.4%)    | 2,523 (18.9%)    | 757 (16.1%)      | 1,179 (17.3%)  | 1,385 (14.4%)    |
| Anxiety                                         | 7,978 (7.8%)   | 3,714 (8.1%)     | 1,459 (6.7%)     | 1,195 (9.0%)     | 329 (7.0%)       | 556 (8.2%)     | 725 (7.5%)       |
| <b>BIOMARKERS</b>                               |                |                  |                  |                  |                  |                |                  |
| Heart rate, mean (SD), beats/min                | 71.9 (14.8)    | 73.6 (15.1)      | 71.3 (14.2)      | 72.0 (15.0)      | 67.4 (13.0)      | 70.3 (14.5)    | 70.3 (14.9)      |
| Creatinine, mean (SD), μmol/L                   | 100.6 (33.0)   | 96.9 (31.1)      | 102.6 (32.6)     | 100.9 (33.6)     | 100.2 (28.5)     | 107.8 (39.4)   | 106.8 (35.1)     |
| White cell count, mean (SD), 10 <sup>9</sup> /L | 7.5 (2.3)      | 7.4 (2.3)        | 7.5 (2.3)        | 7.5 (2.3)        | 7.7 (2.3)        | 7.7 (2.4)      | 7.8 (2.4)        |
| Haemoglobin, mean (SD), g/dL                    | 13.4 (1.7)     | 13.5 (1.6)       | 13.5 (1.7)       | 13.3 (1.7)       | 13.6 (1.6)       | 13.0 (1.8)     | 13.3 (1.8)       |
| GGT, mean (SD), units/L                         | 41.9 (33.7)    | 41.3 (33.5)      | 41.3 (33.6)      | 43.9 (35.8)      | 42.3 (31.7)      | 41.5 (33.3)    | 43.4 (34.7)      |
| HbA1c, mean (SD), %                             | 7.3 (1.6)      | 7.3 (1.6)        | 7.3 (1.6)        | 7.4 (1.6)        | 7.1 (1.5)        | 7.3 (1.5)      | 7.3 (1.6)        |
| <b>MEDICATIONS/ INTERVENTIONS<sup>1</sup></b>   |                |                  |                  |                  |                  |                |                  |
| PCI last 6 months                               | 10,554 (10.3%) | 778 (1.7%)       | 2,357 (10.8%)    | 1,147 (8.6%)     | 2,205 (46.9%)    | 1,961 (28.8%)  | 2,106 (21.9%)    |
| CABG last 6 months                              | 4,600 (4.5%)   | 1,583 (3.5%)     | 666 (3.0%)       | 533 (4.0%)       | 276 (5.9%)       | 622 (9.1%)     | 920 (9.6%)       |
| Short-acting nitrates                           | 39,044 (38.3%) | 13,978 (30.6%)   | 9,120 (41.6%)    | 5,709 (42.8%)    | 2,543 (54.1%)    | 3,351 (49.1%)  | 4,343 (45.1%)    |
| Long-acting nitrates                            | 29,451 (28.9%) | 11,109 (24.3%)   | 7,544 (34.4%)    | 5,075 (38.1%)    | 919 (19.6%)      | 2,190 (32.1%)  | 2,614 (27.2%)    |
| Statins                                         | 80,672 (79.1%) | 32,152 (70.4%)   | 18,615 (84.9%)   | 10,373 (77.8%)   | 4,587 (97.6%)    | 6,425 (94.2%)  | 8,520 (88.6%)    |
| Aspirin                                         | 85,334 (83.6%) | 35,135 (77.0%)   | 19,452 (88.8%)   | 11,038 (82.8%)   | 4,495 (95.6%)    | 6,413 (94.1%)  | 8,801 (91.5%)    |
| Clopidogrel                                     | 88,556 (86.8%) | 81,618 (80%)     | 88,145 (86.4%)   | 93,861 (92%)     | 99,880 (97.9%)   | 98,758 (96.8%) | 96,718 (94.6%)   |
| On ≥1 BP-lowering drugs <sup>2</sup>            | 95,169 (93.3%) | 41,603 (91.1%)   | 20,860 (95.2%)   | 12,126 (91.0%)   | 4,625 (98.4%)    | 6,672 (97.9%)  | 9,283 (96.5%)    |
| Thiazides                                       | 41,091 (40.3%) | 20,480 (44.9%)   | 8,120 (37.1%)    | 5,229 (39.2%)    | 1,323 (28.1%)    | 2,687 (39.4%)  | 3,252 (33.8%)    |
| Beta-blockers                                   | 71,723 (70.3%) | 29,048 (63.6%)   | 15,785 (72.0%)   | 9,422 (70.7%)    | 4,133 (87.9%)    | 5,655 (82.9%)  | 7,680 (79.8%)    |
| ARBs/ACEI                                       | 71,610 (70.2%) | 28,689 (62.9%)   | 15,276 (69.7%)   | 8,835 (66.3%)    | 4,501 (95.8%)    | 6,151 (90.2%)  | 8,158 (84.8%)    |
| Calcium-channel blockers                        | 56,719 (55.6%) | 25,768 (56.5%)   | 13,157 (60.0%)   | 8,006 (60.1%)    | 1,732 (36.9%)    | 3,575 (52.4%)  | 4,481 (46.6%)    |
| Loop diuretics                                  | 43,457 (42.6%) | 17,595 (38.5%)   | 9,998 (45.6%)    | 6,254 (46.9%)    | 1,603 (34.1%)    | 3,451 (50.6%)  | 4,556 (47.4%)    |

Abbreviations: ARB, angiotensin-receptor blockers; ACEI, angiotensin-converting-enzyme inhibitor; BP, blood pressure; SCAD, stable coronary artery disease; CC, complete cases; COPD, chronic obstructive pulmonary disease; DBP, diastolic blood pressure; GGT, gamma-glutamyl transferase; HDL, high-density lipoprotein cholesterol; STEMI, ST-segment elevation MI; SBP, systolic blood pressure.

<sup>1</sup> Medications are provided for descriptive purposes and were not included in the models

<sup>2</sup> Includes ARBs/ACEI, beta-blockers and calcium-channel blockers
