# Supplementary material for: Prognostic models for stable coronary artery disease based on electronic health record cohort of 102 023 patients
Source: PubMed Central journal article supplement — Eur Heart J. 2013 Dec 17;35(13):844–52. doi: 10.1093/eurheartj/eht533 (PMC3971383; doi:10.1093/eurheartj/eht533), 2013-12-17
Supplement: supp_eht533_eht533supp_table3.pdf [file supp_eht533_eht533supp_table3.pdf]

## Rapsomaniki, Prognostic models for stable coronary artery disease based on electronic health record cohort of 102,023 patients

**eTable3 Age and sex adjusted hazard ratios (95% CI) for all-cause mortality by CAD subtype for all candidate predictors.**

|                                                           | Stable angina    | Other CHD        | Stable after     | Stable after STEMI | Stable after NSTEMI |
|-----------------------------------------------------------|------------------|------------------|------------------|--------------------|---------------------|
| <i>SOCIODEMOGRAPHIC CHARACTERISTICS</i>                   |                  |                  |                  |                    |                     |
| Age in men, per year                                      | 1.08 (1.08-1.09) | 1.09 (1.08-1.09) | 1.08 (1.08-1.09) | 1.09 (1.08-1.10)   | 1.08 (1.08-1.09)    |
| Age in women, per year                                    | 1.10 (1.10-1.10) | 1.09 (1.09-1.10) | 1.09 (1.09-1.10) | 1.07 (1.05-1.08)   | 1.07 (1.06-1.08)    |
| Women vs. men                                             | 0.24 (0.17-0.35) | 0.52 (0.31-0.85) | 0.30 (0.16-0.55) | 3.89 (0.98-15.4)   | 1.70 (0.68-4.24)    |
| Ethnicity: Black vs. White                                | 1.04 (0.80-1.34) | 1.07 (0.73-1.59) | 0.74 (0.43-1.26) | 2.52 (0.79-7.99)   | 0.99 (0.37-2.62)    |
| Ethnicity: South Asian vs. White                          | 0.89 (0.73-1.09) | 0.84 (0.62-1.14) | 0.65 (0.43-0.98) | 1.00 (0.41-2.45)   | 0.97 (0.59-1.59)    |
| Ethnicity: Other vs. White                                | 1.04 (0.87-1.26) | 0.98 (0.71-1.36) | 0.72 (0.51-1.03) | 1.01 (0.48-2.13)   | 0.70 (0.37-1.35)    |
| Most deprived quintile, yes vs. no                        | 1.39 (1.32-1.46) | 1.26 (1.18-1.35) | 1.29 (1.18-1.41) | 1.37 (1.10-1.70)   | 1.29 (1.13-1.46)    |
| <i>CAD DIAGNOSIS &amp; SEVERITY</i>                       |                  |                  |                  |                    |                     |
| PCI in last 6 months                                      | 0.42 (0.30-0.59) | 0.68 (0.59-0.79) | 0.62 (0.51-0.74) | 0.63 (0.51-0.78)   | 0.45 (0.38-0.54)    |
| CABG in last 6 months                                     | 0.57 (0.47-0.69) | 0.64 (0.52-0.79) | 0.56 (0.44-0.71) | 0.81 (0.51-1.27)   | 0.46 (0.35-0.60)    |
| Previous or recurrent MI, yes vs. no                      | 1.25 (1.02-1.54) | 1.23 (1.17-1.30) | 1.33 (1.23-1.44) | 1.32 (1.09-1.59)   | 1.29 (1.16-1.43)    |
| Use of long-acting nitrates, yes vs. no                   | 1.39 (1.33-1.46) | 1.39 (1.32-1.47) | 1.36 (1.26-1.46) | 1.22 (1.00-1.49)   | 1.36 (1.23-1.51)    |
| <i>CVD RISK FACTORS</i>                                   |                  |                  |                  |                    |                     |
| Current smoker vs. never                                  | 1.38 (1.27-1.51) | 1.30 (1.21-1.41) | 1.30 (1.17-1.44) | 1.90 (1.47-2.46)   | 1.41 (1.18-1.70)    |
| Ex-smoker vs. never                                       | 1.19 (1.10-1.30) | 1.17 (1.07-1.27) | 1.19 (1.08-1.31) | 1.35 (1.08-1.69)   | 1.17 (1.02-1.34)    |
| Hypertension                                              | 1.20 (1.13-1.26) | 1.12 (1.04-1.21) | 1.30 (1.17-1.44) | 1.32 (1.08-1.61)   | 1.73 (1.49-2.01)    |
| Diabetes mellitus, yes vs. no                             | 1.54 (1.45-1.63) | 1.48 (1.38-1.59) | 1.59 (1.46-1.74) | 1.68 (1.36-2.08)   | 1.45 (1.30-1.63)    |
| Total cholesterol, per 1 mmol/L increase                  | 0.98 (0.95-1.02) | 1.00 (0.96-1.03) | 1.00 (0.95-1.05) | 1.02 (0.92-1.14)   | 1.01 (0.95-1.08)    |
| HDL, per 0.5mmol/L increase                               | 0.95 (0.91-0.99) | 0.94 (0.90-0.98) | 0.91 (0.85-0.96) | 0.95 (0.81-1.11)   | 0.97 (0.89-1.06)    |
| Family history of CHD                                     | 0.76 (0.71-0.81) | 0.79 (0.74-0.85) | 0.82 (0.75-0.90) | 0.87 (0.69-1.10)   | 0.88 (0.76-1.01)    |
| BMI < 18.5 kg/m <sup>2</sup> vs. 25 kg/m <sup>2</sup>     | 1.53 (1.42-1.64) | 1.43 (1.29-1.58) | 1.26 (1.12-1.43) | 1.16 (0.84-1.60)   | 1.28 (1.07-1.53)    |
| BMI 18.5 to 24 kg/m <sup>2</sup> vs. 25 kg/m <sup>2</sup> | 1.12 (1.09-1.15) | 1.09 (1.06-1.12) | 1.06 (1.02-1.10) | 1.03 (0.94-1.13)   | 1.06 (1.01-1.12)    |
| BMI 26 to 29 kg/m <sup>2</sup> vs. 25 kg/m <sup>2</sup>   | 0.95 (0.93-0.96) | 0.96 (0.94-0.97) | 0.98 (0.96-1.00) | 0.99 (0.94-1.04)   | 0.97 (0.95-1.00)    |
| BMI 30 to 34 kg/m <sup>2</sup> vs. 25 kg/m <sup>2</sup>   | 1.04 (1.01-1.07) | 1.05 (1.01-1.09) | 1.08 (1.02-1.13) | 1.09 (0.96-1.24)   | 1.07 (1.00-1.15)    |
| BMI ≥35 kg/m <sup>2</sup> vs. 25 kg/m <sup>2</sup>        | 1.41 (1.31-1.51) | 1.35 (1.23-1.48) | 1.39 (1.23-1.57) | 1.36 (0.99-1.87)   | 1.37 (1.15-1.63)    |
| <i>CVD CO-MORBIDITIES</i>                                 |                  |                  |                  |                    |                     |
| Heart failure, yes vs. no                                 | 2.26 (2.16-2.36) | 2.03 (1.91-2.14) | 1.94 (1.80-2.09) | 2.19 (1.80-2.66)   | 2.42 (2.17-2.69)    |
| Peripheral arterial disease, yes vs. no                   | 1.66 (1.55-1.78) | 1.60 (1.48-1.72) | 1.61 (1.46-1.77) | 1.79 (1.40-2.30)   | 1.65 (1.46-1.87)    |
| Atrial fibrillation, yes vs. no                           | 1.57 (1.49-1.65) | 1.51 (1.41-1.61) | 1.44 (1.33-1.57) | 1.67 (1.35-2.06)   | 1.51 (1.36-1.68)    |
| Hist. of stroke, yes vs. no                               | 1.63 (1.54-1.73) | 1.59 (1.48-1.72) | 1.64 (1.50-1.80) | 1.77 (1.37-2.29)   | 1.51 (1.33-1.71)    |
| <i>NON-CVD COMORBIDITIES</i>                              |                  |                  |                  |                    |                     |
| Chronic kidney disease, yes vs. no                        | 1.84 (1.69-2.01) | 1.99 (1.78-2.22) | 1.87 (1.64-2.12) | 1.30 (0.99-1.71)   | 1.69 (1.49-1.92)    |
| COPD, yes vs. no                                          | 1.47 (1.40-1.55) | 1.44 (1.36-1.54) | 1.39 (1.29-1.50) | 1.62 (1.34-1.97)   | 1.51 (1.36-1.69)    |
| Hist. of cancer, yes vs. no                               | 1.53 (1.43-1.62) | 1.42 (1.31-1.54) | 1.43 (1.29-1.58) | 1.88 (1.50-2.36)   | 1.54 (1.35-1.75)    |
| Chronic liver disease, yes vs. no                         | 2.24 (1.85-2.71) | 2.45 (1.88-3.20) | 2.41 (1.87-3.12) | 2.96 (1.74-5.05)   | 2.31 (1.63-3.29)    |
| Rheumatoid arthritis, yes vs. no                          | 1.10 (1.01-1.21) | 1.09 (0.97-1.23) | 1.06 (0.91-1.22) | 1.11 (0.80-1.55)   | 1.02 (0.85-1.22)    |
| Hyperthyroidism, yes vs. no                               | 1.28 (1.11-1.47) | 1.16 (0.96-1.40) | 1.45 (1.18-1.79) | 0.75 (0.35-1.59)   | 1.10 (0.79-1.53)    |
| Hypothyroidism, yes vs. no                                | 1.04 (0.95-1.13) | 1.06 (0.95-1.18) | 1.00 (0.87-1.14) | 1.14 (0.82-1.58)   | 1.28 (1.09-1.50)    |
| <i>PSYCHOSOCIAL CHARACTERISTICS</i>                       |                  |                  |                  |                    |                     |
| Anxiety, yes vs. no                                       | 1.40 (1.30-1.50) | 1.39 (1.26-1.53) | 1.21 (1.07-1.37) | 1.59 (1.18-2.14)   | 1.41 (1.19-1.66)    |
| Depression, yes vs. no                                    | 1.46 (1.38-1.55) | 1.44 (1.33-1.55) | 1.44 (1.31-1.58) | 1.46 (1.17-1.84)   | 1.53 (1.35-1.74)    |
| <i>BIOMARKERS</i>                                         |                  |                  |                  |                    |                     |
| Heart rate, per 10 beats/min increase                     | 1.26 (1.22-1.30) | 1.25 (1.22-1.29) | 1.24 (1.18-1.30) | 1.37 (1.24-1.52)   | 1.26 (1.18-1.36)    |
| Creatinine, per 30 μmol/L increase                        | 1.20 (1.17-1.23) | 1.19 (1.16-1.22) | 1.19 (1.15-1.23) | 1.34 (1.24-1.44)   | 1.23 (1.19-1.27)    |
| White cell count, per 1.5 10 <sup>9</sup> /L increase     | 1.19 (1.16-1.21) | 1.16 (1.13-1.19) | 1.17 (1.13-1.21) | 1.23 (1.14-1.32)   | 1.19 (1.14-1.24)    |
| Haemoglobin, per 1.5 g/dL increase                        | 0.69 (0.65-0.74) | 0.71 (0.67-0.75) | 0.70 (0.64-0.76) | 0.68 (0.62-0.75)   | 0.67 (0.60-0.74)    |
| lnGGT, per 1 SD increase, units/L                         | 1.35 (1.28-1.43) | 1.33 (1.24-1.43) | 1.38 (1.28-1.49) | 1.37 (1.11-1.70)   | 1.37 (1.24-1.53)    |
| HbA1c, per 1 SD increase, %                               | 1.17 (1.14-1.20) | 1.16 (1.12-1.20) | 1.21 (1.16-1.26) | 1.23 (1.10-1.38)   | 1.20 (1.11-1.31)    |

Abbreviations: BMI, body mass index; CABG, coronary artery bypass graft; CAD, coronary artery disease; CHD, coronary heart disease; COPD, chronic obstructive pulmonary disease; GGT, gamma-glutamyl transferase; HDL, high-density lipoprotein cholesterol; MI, myocardial infarction; NSTEMI, non-ST-segment elevation myocardial infarction; PCI, percutaneous coronary intervention; SD, standard deviation; STEMI, ST-segment elevation myocardial infarction.
