# Supplementary material for: Prognostic models for stable coronary artery disease based on electronic health record cohort of 102 023 patients
Source: PubMed Central journal article supplement — Eur Heart J. 2013 Dec 17;35(13):844–52. doi: 10.1093/eurheartj/eht533 (PMC3971383; doi:10.1093/eurheartj/eht533), 2013-12-17
Supplement: supp_eht533_eht533supp_table4.pdf [file supp_eht533_eht533supp_table4.pdf]

Rapsomaniki, Prognostic models for stable coronary artery disease based on electronic health record cohort of 102,023 patients

**eTable4 Age and sex adjusted HRs (95% CI) for non-fatal MI or coronary death by CAD subtype for all candidate predictors.**

|                                                           | Stable angina    | Other CHD        | Stable after unstable angina | Stable after STEMI | Stable after NSTEMI |
|-----------------------------------------------------------|------------------|------------------|------------------------------|--------------------|---------------------|
| <i>SOCIODEMOGRAPHIC CHARACTERISTICS</i>                   |                  |                  |                              |                    |                     |
| Age in men, per year                                      | 1.06 (1.05-1.07) | 1.06 (1.05-1.06) | 1.06 (1.05-1.07)             | 1.04 (1.03-1.05)   | 1.06 (1.05-1.07)    |
| Age in women, per year                                    | 1.08 (1.07-1.08) | 1.07 (1.06-1.08) | 1.08 (1.07-1.09)             | 1.03 (1.01-1.05)   | 1.05 (1.04-1.06)    |
| Women vs. men                                             | 0.15 (0.08-0.28) | 0.26 (0.12-0.56) | 0.19 (0.08-0.44)             | 1.59 (0.40-6.25)   | 2.32 (0.84-6.41)    |
| Ethnicity: Black vs. White                                | 0.56 (0.28-1.09) | 1.11 (0.63-1.97) | 0.46 (0.17-1.20)             | 0.92 (0.66-1.91)   | 0.82 (0.26-2.61)    |
| Ethnicity: South Asian vs. White                          | 1.28 (0.96-1.70) | 1.27 (0.94-1.71) | 1.16 (0.78-1.72)             | 1.66 (0.86-3.22)   | 1.43 (0.90-2.27)    |
| Ethnicity: Other vs. White                                | 1.03 (0.73-1.46) | 1.10 (0.77-1.57) | 1.04 (0.65-1.67)             | 1.16 (0.51-2.61)   | 0.99 (0.54-1.84)    |
| Most deprived quintile, yes vs. no                        | 1.38 (1.26-1.51) | 1.26 (1.14-1.40) | 1.21 (1.07-1.38)             | 1.14 (0.89-1.47)   | 1.29 (1.11-1.51)    |
| <i>CAD DIAGNOSIS &amp; SEVERITY</i>                       |                  |                  |                              |                    |                     |
| PCI in last 6 months                                      | 0.51 (0.31-0.83) | 0.58 (0.47-0.72) | 0.78 (0.62-0.99)             | 0.69 (0.55-0.86)   | 0.49 (0.40-0.60)    |
| CABG in last 6 months                                     | 0.63 (0.48-0.84) | 0.52 (0.38-0.72) | 0.61 (0.44-0.84)             | 0.55 (0.31-0.96)   | 0.33 (0.23-0.48)    |
| Previous or recurrent MI, yes vs. no                      | 2.41 (1.84-3.15) | 1.46 (1.34-1.58) | 1.99 (1.78-2.22)             | 1.65 (1.34-2.03)   | 1.64 (1.45-1.86)    |
| Use of long-acting nitrates, yes vs. no                   | 1.57 (1.45-1.71) | 1.64 (1.51-1.78) | 1.81 (1.62-2.02)             | 1.50 (1.20-1.87)   | 1.96 (1.73-2.22)    |
| <i>CVD RISK FACTORS</i>                                   |                  |                  |                              |                    |                     |
| Current smoker vs. never                                  | 1.50 (1.34-1.68) | 1.26 (1.12-1.43) | 1.39 (1.16-1.65)             | 1.63 (1.24-2.14)   | 1.21 (0.99-1.48)    |
| Ex-smoker vs. never                                       | 1.24 (1.10-1.40) | 1.06 (0.93-1.19) | 1.30 (1.07-1.58)             | 1.26 (0.97-1.65)   | 1.15 (0.99-1.33)    |
| Hypertension                                              | 1.26 (1.13-1.40) | 1.40 (1.23-1.59) | 1.57 (1.34-1.84)             | 1.27 (1.02-1.58)   | 2.31 (1.90-2.80)    |
| Diabetes mellitus, yes vs. no                             | 1.73 (1.57-1.90) | 1.60 (1.45-1.77) | 1.87 (1.65-2.13)             | 1.82 (1.44-2.30)   | 1.87 (1.63-2.13)    |
| Total cholesterol, per 1 mmol/L increase                  | 1.06 (1.02-1.10) | 1.07 (1.01-1.13) | 1.02 (0.96-1.10)             | 1.08 (0.96-1.21)   | 1.06 (0.99-1.14)    |
| HDL, per 0.5mmol/L increase                               | 0.84 (0.79-0.89) | 0.84 (0.79-0.90) | 0.76 (0.68-0.84)             | 0.98 (0.81-1.18)   | 0.86 (0.77-0.96)    |
| Family history of CHD                                     | 0.93 (0.84-1.04) | 0.91 (0.83-1.01) | 0.94 (0.82-1.07)             | 1.02 (0.80-1.30)   | 1.11 (0.95-1.30)    |
| BMI < 18.5 kg/m <sup>2</sup> vs. 25 kg/m <sup>2</sup>     | 1.20 (1.05-1.38) | 1.02 (0.87-1.21) | 0.94 (0.77-1.15)             | 0.97 (0.66-1.44)   | 0.81 (0.64-1.04)    |
| BMI 18.5 to 24 kg/m <sup>2</sup> vs. 25 kg/m <sup>2</sup> | 1.05 (1.00-1.09) | 1.00 (0.95-1.05) | 0.97 (0.91-1.04)             | 0.98 (0.88-1.10)   | 0.94 (0.87-1.01)    |
| BMI 26 to 29 kg/m <sup>2</sup> vs. 25 kg/m <sup>2</sup>   | 0.99 (0.97-1.01) | 1.01 (0.99-1.04) | 1.03 (1.00-1.07)             | 1.05 (0.98-1.12)   | 1.07 (1.03-1.11)    |
| BMI 30 to 34 kg/m <sup>2</sup> vs. 25 kg/m <sup>2</sup>   | 1.09 (1.04-1.15) | 1.09 (1.03-1.16) | 1.14 (1.06-1.22)             | 1.27 (1.12-1.44)   | 1.22 (1.12-1.32)    |
| BMI ≥35 kg/m <sup>2</sup> vs. 25 kg/m <sup>2</sup>        | 1.40 (1.24-1.58) | 1.28 (1.11-1.47) | 1.36 (1.15-1.63)             | 1.83 (1.40-2.41)   | 1.50 (1.23-1.83)    |
| <i>CVD CO-MORBIDITIES</i>                                 |                  |                  |                              |                    |                     |
| Heart failure, yes vs. no                                 | 2.16 (1.99-2.35) | 1.95 (1.79-2.13) | 2.28 (2.04-2.56)             | 2.55 (2.03-3.21)   | 2.57 (2.25-2.94)    |
| Peripheral arterial disease, yes vs. no                   | 1.35 (1.23-1.48) | 1.40 (1.26-1.56) | 1.30 (1.15-1.48)             | 1.85 (1.44-2.37)   | 1.28 (1.12-1.47)    |
| Atrial fibrillation, yes vs. no                           | 1.44 (1.28-1.61) | 1.55 (1.38-1.74) | 1.48 (1.29-1.71)             | 1.39 (0.98-1.95)   | 1.44 (1.23-1.68)    |
| Hist. of stroke, yes vs. no                               | 1.89 (1.68-2.13) | 1.66 (1.48-1.86) | 1.93 (1.68-2.21)             | 1.75 (1.31-2.34)   | 1.82 (1.57-2.12)    |
| <i>NON-CVD COMORBIDITIES</i>                              |                  |                  |                              |                    |                     |
| Chronic kidney disease, yes vs. no                        | 1.60 (1.37-1.87) | 2.01 (1.71-2.37) | 1.78 (1.47-2.16)             | 1.54 (1.13-2.11)   | 1.65 (1.42-1.92)    |
| COPD, yes vs. no                                          | 1.30 (1.19-1.42) | 1.34 (1.22-1.47) | 1.30 (1.16-1.46)             | 1.39 (1.10-1.74)   | 1.42 (1.24-1.62)    |
| Hist. of cancer, yes vs. no                               | 1.01 (0.89-1.15) | 0.92 (0.79-1.06) | 0.90 (0.75-1.08)             | 0.85 (0.60-1.22)   | 1.26 (1.07-1.50)    |
| Chronic liver disease, yes vs. no                         | 1.18 (0.76-1.83) | 1.50 (0.91-2.45) | 2.06 (1.37-3.09)             | 1.37 (0.56-3.32)   | 1.40 (0.84-2.33)    |
| Rheumatoid arthritis, yes vs. no                          | 1.31 (1.12-1.54) | 1.08 (0.89-1.30) | 1.06 (0.85-1.32)             | 1.02 (0.66-1.56)   | 0.89 (0.70-1.13)    |
| Hyperthyroidism, yes vs. no                               | 1.43 (1.12-1.83) | 1.02 (0.75-1.39) | 1.28 (0.91-1.80)             | 0.96 (0.42-2.16)   | 0.99 (0.65-1.50)    |
| Hypothyroidism, yes vs. no                                | 1.03 (0.89-1.21) | 1.03 (0.87-1.21) | 0.99 (0.81-1.22)             | 1.08 (0.72-1.62)   | 1.28 (1.05-1.56)    |
| <i>PSYCHOSOCIAL CHARACTERISTICS</i>                       |                  |                  |                              |                    |                     |
| Anxiety, yes vs. no                                       | 1.10 (0.95-1.27) | 1.16 (0.98-1.36) | 1.10 (0.91-1.34)             | 1.27 (0.88-1.83)   | 1.14 (0.92-1.42)    |
| Depression, yes vs. no                                    | 1.20 (1.08-1.33) | 1.19 (1.06-1.35) | 1.22 (1.05-1.40)             | 1.53 (1.19-1.97)   | 1.21 (1.03-1.43)    |
| <i>BIOMARKERS</i>                                         |                  |                  |                              |                    |                     |
| Heart rate, per 10 beats/min increase                     | 1.18 (1.09-1.28) | 1.21 (1.11-1.31) | 1.16 (1.02-1.31)             | 1.26 (1.13-1.40)   | 1.19 (1.08-1.31)    |
| Creatinine, per 30 μmol/L increase                        | 1.21 (1.17-1.26) | 1.20 (1.16-1.25) | 1.22 (1.16-1.28)             | 1.29 (1.17-1.41)   | 1.24 (1.18-1.30)    |
| White cell count, per 1.5 10 <sup>9</sup> /L increase     | 1.18 (1.14-1.22) | 1.14 (1.10-1.19) | 1.18 (1.13-1.24)             | 1.16 (1.07-1.26)   | 1.16 (1.10-1.22)    |
| Haemoglobin, per 1.5 g/dL increase                        | 0.76 (0.72-0.80) | 0.76 (0.72-0.80) | 0.78 (0.73-0.84)             | 0.82 (0.73-0.91)   | 0.77 (0.71-0.84)    |
| lnGGT, per 1 SD increase, units/L                         | 1.21 (1.06-1.38) | 1.23 (1.03-1.46) | 1.33 (1.18-1.52)             | 1.19 (0.96-1.49)   | 1.24 (1.05-1.46)    |
| HbA1c, per 1 SD increase, %                               | 1.27 (1.22-1.33) | 1.23 (1.16-1.31) | 1.29 (1.21-1.39)             | 1.21 (1.07-1.36)   | 1.26 (1.18-1.35)    |

Abbreviations: BMI, body mass index; CABG, coronary artery bypass graft; CAD, coronary artery disease; CHD, coronary heart disease; COPD, chronic obstructive pulmonary disease; GGT, gamma-glutamyl transferase; HDL, high-density lipoprotein cholesterol; MI, myocardial infarction; NSTEMI, non-ST-segment elevation myocardial infarction; PCI, percutaneous coronary intervention; SD, standard deviation; STEMI, ST-segment elevation myocardial infarction.
