# Supplementary material for: Prognostic models for stable coronary artery disease based on electronic health record cohort of 102 023 patients
Source: PubMed Central journal article supplement — Eur Heart J. 2013 Dec 17;35(13):844–52. doi: 10.1093/eurheartj/eht533 (PMC3971383; doi:10.1093/eurheartj/eht533), 2013-12-17
Supplement: supp_eht533_eht533supp_table5.pdf [file supp_eht533_eht533supp_table5.pdf]

Rapsomaniki, Prognostic models for stable coronary artery disease based on electronic health record cohort of 102,023 patients

**eTable5 Hazard ratios (95% confidence intervals) for all-cause mortality and non-fatal MI or coronary death adjusted for age and sex or adjusted for all covariates shown in this table (fully adjusted).**

|                                                           | All-cause mortality |                  | Non-fatal MI or coronary death |                  |
|-----------------------------------------------------------|---------------------|------------------|--------------------------------|------------------|
|                                                           | Age & sex adj.      | Fully adjusted   | Age & sex adj.                 | Fully adjusted   |
| <i>SOCIODEMOGRAPHIC CHARACTERISTICS</i>                   |                     |                  |                                |                  |
| Age in men, per year                                      | 1.09 (1.08-1.09)    | 1.05 (1.05-1.05) | 1.06 (1.06-1.06)               | 1.04 (1.04-1.04) |
| Age in women, per year                                    | 1.09 (1.09-1.10)    | 1.06 (1.06-1.06) | 1.07 (1.07-1.08)               | 1.06 (1.05-1.06) |
| Women vs. men                                             | 0.39 (0.31-0.49)    | 0.31 (0.25-0.39) | 0.21 (0.15-0.29)               | 0.18 (0.13-0.26) |
| Ethnicity: Black vs. White                                | 1.01 (0.84-1.21)    | 0.84 (0.69-1.01) | 0.66 (0.47-0.93)               | 0.60 (0.43-0.83) |
| Ethnicity: Other vs. White                                | 0.94 (0.80-1.11)    | 0.95 (0.81-1.11) | 1.05 (0.87-1.26)               | 1.15 (0.95-1.39) |
| Ethnicity: South Asian vs. White                          | 0.84 (0.72-0.98)    | 0.76 (0.66-0.89) | 1.26 (1.06-1.49)               | 1.12 (0.95-1.33) |
| Most deprived quintile, yes vs. no                        | 1.33 (1.29-1.38)    | 1.14 (1.10-1.18) | 1.31 (1.24-1.38)               | 1.11 (1.06-1.18) |
| <i>CAD DIAGNOSIS &amp; SEVERITY</i>                       |                     |                  |                                |                  |
| Other CHD vs. stable angina                               | 1.11 (1.07-1.15)    | 1.10 (1.05-1.15) | 1.52 (1.43-1.61)               | 1.19 (1.12-1.28) |
| Unstable angina vs. stable angina                         | 1.20 (1.15-1.26)    | 1.10 (1.05-1.15) | 1.72 (1.61-1.84)               | 1.34 (1.24-1.43) |
| NSTEMI vs. stable angina                                  | 1.55 (1.49-1.62)    | 1.52 (1.45-1.59) | 2.93 (2.75-3.12)               | 2.45 (2.29-2.62) |
| STEMI vs. stable angina                                   | 0.93 (0.86-1.00)    | 1.34 (1.23-1.45) | 1.66 (1.50-1.84)               | 2.01 (1.81-2.23) |
| PCI in last 6 months                                      | 0.67 (0.63-0.72)    | 0.68 (0.63-0.73) | 0.89 (0.82-0.97)               | 0.70 (0.64-0.77) |
| CABG in last 6 months                                     | 0.64 (0.59-0.70)    | 0.56 (0.52-0.62) | 0.60 (0.53-0.69)               | 0.43 (0.37-0.49) |
| Previous or recurrent MI, yes vs. no                      | 1.28 (1.24-1.32)    | 1.15 (1.10-1.20) | 1.84 (1.76-1.93)               | 1.39 (1.32-1.47) |
| Use of long-acting nitrates, yes vs. no                   | 1.39 (1.35-1.43)    | 1.18 (1.14-1.22) | 1.73 (1.66-1.81)               | 1.40 (1.34-1.47) |
| <i>CVD RISK FACTORS</i>                                   |                     |                  |                                |                  |
| Current smoker vs. never                                  | 1.33 (1.27-1.38)    | 1.24 (1.17-1.30) | 1.32 (1.23-1.41)               | 1.18 (1.09-1.28) |
| Ex-smoker vs. never                                       | 1.19 (1.14-1.24)    | 1.13 (1.08-1.18) | 1.19 (1.10-1.28)               | 1.09 (1.00-1.19) |
| Hypertension                                              | 1.22 (1.18-1.27)    | 1.04 (0.99-1.11) | 1.35 (1.27-1.43)               | 1.01 (0.91-1.11) |
| Diabetes mellitus, yes vs. no                             | 1.57 (1.52-1.63)    | 1.17 (1.10-1.24) | 1.84 (1.76-1.94)               | 1.24 (1.14-1.35) |
| Total cholesterol, per 1 SD increase, mmol/L              | 0.97 (0.95-1.00)    | 0.99 (0.95-1.02) | 0.98 (0.95-1.01)               | 1.05 (1.02-1.09) |
| HDL, per 1 SD increase, mmol/L                            | 0.93 (0.91-0.96)    | 0.98 (0.97-1.00) | 0.84 (0.81-0.87)               | 0.92 (0.89-0.95) |
| Family history of CHD                                     | 0.81 (0.78-0.84)    | 0.84 (0.81-0.87) | 1.00 (0.95-1.05)               | 0.94 (0.89-1.00) |
| BMI < 18.5 kg/m <sup>2</sup> vs. 25 kg/m <sup>2</sup>     | 1.42 (1.35-1.49)    | 1.62 (1.54-1.70) | 1.00 (0.92-1.08)               | 1.24 (1.14-1.34) |
| BMI 18.5 to 24 kg/m <sup>2</sup> vs. 25 kg/m <sup>2</sup> | 1.09 (1.08-1.11)    | 1.14 (1.12-1.16) | 0.99 (0.97-1.01)               | 1.06 (1.03-1.08) |
| BMI 26 to 29 kg/m <sup>2</sup> vs. 25 kg/m <sup>2</sup>   | 0.96 (0.95-0.97)    | 0.92 (0.91-0.92) | 1.02 (1.01-1.03)               | 0.96 (0.95-0.97) |
| BMI 30 to 34 kg/m <sup>2</sup> vs. 25 kg/m <sup>2</sup>   | 1.06 (1.04-1.08)    | 0.93 (0.91-0.94) | 1.14 (1.11-1.17)               | 0.96 (0.93-0.99) |
| BMI ≥35 kg/m <sup>2</sup> vs. 25 kg/m <sup>2</sup>        | 1.41 (1.35-1.48)    | 1.06 (1.01-1.11) | 1.41 (1.32-1.51)               | 1.01 (0.94-1.09) |
| <i>CVD CO-MORBIDITIES</i>                                 |                     |                  |                                |                  |
| Heart failure, yes vs. no                                 | 2.15 (2.09-2.21)    | 1.49 (1.44-1.54) | 2.25 (2.16-2.35)               | 1.55 (1.47-1.63) |
| Peripheral arterial disease, yes vs. no                   | 1.68 (1.62-1.75)    | 1.30 (1.24-1.36) | 1.93 (1.82-2.05)               | 1.42 (1.34-1.51) |
| Atrial fibrillation, yes vs. no                           | 1.55 (1.50-1.60)    | 1.18 (1.14-1.23) | 1.45 (1.38-1.52)               | 1.16 (1.10-1.22) |
| Hist. of stroke, yes vs. no                               | 1.64 (1.58-1.70)    | 1.32 (1.26-1.37) | 1.52 (1.44-1.61)               | 1.19 (1.11-1.26) |
| <i>NON-CVD COMORBIDITIES</i>                              |                     |                  |                                |                  |
| Chronic kidney disease, yes vs. no                        | 1.89 (1.80-1.99)    | 1.12 (1.06-1.19) | 1.95 (1.81-2.10)               | 1.17 (1.08-1.27) |
| COPD, yes vs. no                                          | 1.47 (1.42-1.51)    | 1.16 (1.12-1.19) | 1.34 (1.28-1.41)               | 1.09 (1.03-1.14) |
| Hist. of cancer, yes vs. no                               | 1.49 (1.44-1.55)    | 1.38 (1.33-1.43) | 1.01 (0.94-1.08)               | 0.95 (0.89-1.02) |
| Chronic liver disease, yes vs. no                         | 2.25 (2.00-2.53)    | 1.35 (1.20-1.53) | 1.55 (1.26-1.90)               | 1.06 (0.86-1.31) |
| Rheumatoid arthritis, yes vs. no                          | 1.11 (1.05-1.17)    | 0.95 (0.90-1.01) | 1.17 (1.07-1.28)               | 0.98 (0.90-1.07) |
| Hyperthyroidism, yes vs. no                               | 1.24 (1.14-1.36)    | 1.07 (0.98-1.17) | 1.23 (1.07-1.42)               | 1.05 (0.91-1.22) |
| Hypothyroidism, yes vs. no                                | 1.08 (1.02-1.13)    | 0.96 (0.91-1.01) | 1.12 (1.03-1.21)               | 0.97 (0.89-1.05) |
| <i>PSYCHOSOCIAL CHARACTERISTICS</i>                       |                     |                  |                                |                  |
| Anxiety, yes vs. no                                       | 1.37 (1.31-1.44)    | 1.14 (1.08-1.19) | 1.14 (1.05-1.23)               | 1.02 (0.94-1.10) |
| Depression, yes vs. no                                    | 1.48 (1.43-1.54)    | 1.09 (1.05-1.14) | 1.28 (1.21-1.35)               | 1.02 (0.95-1.09) |
| <i>BIOMARKERS</i>                                         |                     |                  |                                |                  |
| Heart rate, per 1 SD increase, beats/min                  | 1.25 (1.23-1.27)    | 1.10 (1.08-1.12) | 1.16 (1.09-1.23)               | 1.08 (1.03-1.14) |
| Creatinine, per 1SD increase, µmol/L                      | 1.21 (1.19-1.22)    | 1.07 (1.06-1.08) | 1.24 (1.21-1.26)               | 1.09 (1.06-1.11) |
| White cell count, per 1 SD increase, 10 <sup>9</sup> /L   | 1.22 (1.20-1.24)    | 1.13 (1.11-1.15) | 1.22 (1.19-1.25)               | 1.11 (1.08-1.14) |
| Haemoglobin, per 1 SD increase, g/dL                      | 0.66 (0.65-0.67)    | 0.75 (0.73-0.76) | 0.72 (0.69-0.74)               | 0.80 (0.77-0.82) |
| lnGGT, per 1 SD increase, units/L                         | 1.36 (1.30-1.42)    | 1.23 (1.19-1.27) | 1.25 (1.11-1.40)               | 1.13 (1.00-1.27) |
| HbA1c, per 1 SD increase, %                               | 1.18 (1.16-1.21)    | 1.08 (1.04-1.11) | 1.26 (1.22-1.31)               | 1.11 (1.06-1.16) |

Abbreviations: BMI, body mass index; CABG, coronary artery bypass graft; CAD, coronary artery disease; CHD, coronary heart disease; COPD, chronic obstructive pulmonary disease; GGT, gamma-glutamyl transferase; HDL, high-density lipoprotein cholesterol; MI, myocardial infarction; NSTEMI, non-ST-segment elevation myocardial infarction; PCI, percutaneous coronary intervention; SD, standard deviation; STEMI, ST-segment elevation myocardial infarction.
